# Supplementary material
Source: publisher figshare collection journal article supplement (https://rs.figshare.com/ndownloader/files/14050481)
Supplement: Supplementary file 1 [file 14050481]

## Sheet: Sheet1
Table S1: Detailed species list including NCBI accession numbers.
Order	Group 1	Group 2	Genus	Species epithet	Species author and description year	Species name in NCBI	1KITE Library identifier	NCBI BioProject Accession / Download Source	BioSample Accession	Run Accession	TSA Accession	TSA Version	Study
Blattodea	"Ectobiidae"	Blattellinae	Asiablatta	kyotensis	(Asahina, 1976)	identical	INSofmTDARAAPEI-84	PRJNA286658	SAMN04005126	SRR2230511	GDWW00000000	GDWW01000000	Present study
Blattodea	"Ectobiidae"	Blattellinae	Blattella	germanica	(Linnaeus, 1767)	identical	INSodkTAARAAPEI-47	PRJNA273023	SAMN03339326	SRR1811959	GDCR00000000	GDCR01000000	Wipfler et al., unpublished
Blattodea	"Ectobiidae"	Blattellinae	Episymploce	sundaica	(Hebard, 1929)	identical	INSofmTCKRAAPEI-35	PRJNA286368	SAMN04005153	SRR2230538	GDYC00000000	GDYC01000000	Present study
Blattodea	"Ectobiidae"	Blattellinae	Loboptera	decipiens	(Germar, 1817)	identical	INSofmTAWRAAPEI-109	PRJNA286399	SAMN04005184	SRR2230569	GDYK00000000	GDYK01000000	Present study
Blattodea	"Ectobiidae"	Blattellinae	Lobopterella	dimidiatipes	(Bolívar, 1890)	identical	INSofmTCHRAAPEI-32	PRJNA286400	SAMN04005185	SRR2230570	GDZZ00000000	GDZZ01000000	Present study
Blattodea	"Ectobiidae"	Blattellinae	Paratemnopteryx	couloniana	(Saussure, 1863)	identical	INShkeTBURAAPEI-15	PRJNA286432	SAMN04005217	SRR2230602	GDZI00000000	GDZI01000000	Present study
Blattodea	"Ectobiidae"	Blattellinae	Symploce	sp.	-	Name in NCBI: Symploce sp. AD-2014	INStmbTAQRAAPEI-94	PRJNA273059	SAMN03339362	SRR1811995	GDCG00000000	GDCG01000000	Wipfler et al., unpublished
Blattodea	"Ectobiidae"	Blattellinae	Ischnoptera	deropeltiformis	(Brunner von Wattenwyl, 1865)	identical	INSerlTBPRAAPEI-71	PRJNA272190	SAMN03331977	SRR2051496	GDEC00000000	GDEC01000000	Present study
Blattodea	"Ectobiidae"	-	Anallacta	methanoides	Shelford, 1908	identical	INSofmTCXRAAPEI-75	PRJNA286338	SAMN04005121	SRR2230506	GEAA00000000	GEAA01000000	Present study
Blattodea	"Ectobiidae"	Ectobiinae	Ectobius	sylvestris	(Poda, 1761)	identical	RINSinlTCSRAAPEI-41	PRJNA286364	SAMN04005149	SRR2230534	GDYP00000000	GDYP01000000	Present study
Blattodea	"Ectobiidae"	Nyctiborinae	Nyctibora	sp.	-	Name in NCBI: Nyctibora sp. AD-2015	INSkzdTAJRAAPEI-26	PRJNA286416	SAMN04005201	SRR2230586	GDZE00000000	GDZE01000000	Present study
Blattodea	"Ectobiidae"	Pseudophyllodromiinae	Balta	vilis	(Brunner von Wattenwyl, 1865)	identical	INSofmTBIRAAPEI-57	PRJNA286346	SAMN04005131	SRR2230516	GDYJ00000000	GDYJ01000000	Present study
Blattodea	"Ectobiidae"	Pseudophyllodromiinae	Cariblatta	sp.	-	Name in NCBI: Cariblatta sp. AD-2015	INSkzdTAURAAPEI-55	PRJNA286348	SAMN04005133	SRR2230518	GDZD00000000	GDZD01000000	Present study
Blattodea	"Ectobiidae"	Pseudophyllodromiinae	Ellipsidion	sp.	-	Name in NCBI: Ellipsidion sp. AD-2015	INSofmTBWRAAPEI-126	PRJNA286365	SAMN04005150	SRR2230535	GDYE00000000	GDYE01000000	Present study
Blattodea	"Ectobiidae"	Pseudophyllodromiinae	Euthlastoblatta	diaphana	(Fabricius, 1793)	identical	INSofmTATRAAPEI-90	PRJNA286375	SAMN04005160	SRR2230545	GDZY00000000	GDZY01000000	Present study
Blattodea	"Ectobiidae"	Pseudophyllodromiinae	Sundablatta	sexpunctata	(Hanitsch, 1923)	identical	INSeqtTAORAAPEI-9	PRJNA273058	SAMN03339361	SRR1811994	GDCJ00000000	GDCJ01000000	Wipfler et al., unpublished
Blattodea	"Ectobiidae"	Pseudophyllodromiinae	Supella	longipalpa	(Fabricius, 1798)	identical	INSofmTCVRAAPEI-71	PRJNA286461	SAMN04005247	SRR2230632	GDWU00000000	GDWU01000000	Present study
Blattodea	Blaberidae	Blaberinae	Blaberus	atropos	(Stoll, 1813)	identical	INSfrgTAVRAAPEI-41	PRJNA219531	SAMN02047121	SRR921572	GAYD00000000	GAYD02000000	Misof et al. 2014 (current assembly)
Blattodea	Blaberidae	Diplopterinae	Diploptera	punctata	(Eschscholtz, 1822)	identical	INSpmbTAERAAPEI-203	PRJNA286363	SAMN04005148	SRR2230533	GDYG00000000	GDYG01000000	Present study
Blattodea	Blaberidae	Gyninae	Gyna	lurida	Saussure, 1899	identical	INShkeTBGRAAPEI-84	PRJNA286383	SAMN04005168	SRR2230553	GDZJ00000000	GDZJ01000000	Present study
Blattodea	Blaberidae	Oxyhaloinae	Nauphoeta	cinerea	(Olivier, 1789)	identical	INStmbTBLRAAPEI-39	PRJNA273041	SAMN03339344	SRR1811977	GDCI00000000	GDCI01000000	Wipfler et al., unpublished
Blattodea	Blaberidae	Oxyhaloinae	Princisia	vanwaerebeki	van Herrewege, 1973	identical	INSqiqTDCRAAPEI-126	PRJNA286440	SAMN04005226	SRR2230611	GDXG00000000	GDXG01000000	Present study
Blattodea	Blaberidae	Panchlorinae	Panchlora	nivea	(Linnaeus, 1758)	identical	INSofmTBORAAPEI-79	PRJNA286426	SAMN04005211	SRR2230596	GDWQ00000000	GDWQ01000000	Present study
Blattodea	Blaberidae	Zetoborinae	Schultesia	lampyridiformis	Roth, 1973	identical	INStmbTAFRAAPEI-57	PRJNA273055	SAMN03339358	SRR1811991	GCPR00000000	GCPR01000000	Wipfler et al., unpublished
Blattodea	Blattidae	Archiblattinae	Catara	rugosicollis	(Brunner von Wattenwyl, 1865)	identical	INSodkTAKRAAPEI-89	PRJNA273026	SAMN03339329	SRR1811962	GDCA00000000	GDCA01000000	Wipfler et al., unpublished
Blattodea	Blattidae	Blattinae	Deropeltis	erythrocephala	(Fabricius, 1781)	identical	INShkeTCLRAAPEI-44	PRJNA286357	SAMN04005142	SRR2230527	GDZH00000000	GDZH01000000	Present study
Blattodea	Blattidae	Blattinae	Periplaneta	americana	(Linnaeus, 1758)	identical	INSfrgTAARAAPEI-19	PRJNA219590	SAMN02047124	SRR921630	GAWS00000000	GAWS02000000	Misof et al. 2014 (current assembly)
Blattodea	Blattidae	Blattinae	Shelfordella	lateralis	(Walker, 1868)	identical	INStmbTAKRAAPEI-84	PRJNA286452	SAMN04005238	SRR2230623	GDXP00000000	GDXP01000000	Present study
Blattodea	Blattidae	Polyzosteriinae	Eurycotis	floridana	(Walker, 1868)	identical	INSofmTAFRAAPEI-41	PRJNA286373	SAMN04005158	SRR2230543	GDYS00000000	GDYS01000000	Present study
Blattodea	Blattidae	Polyzosteriinae	Methana	parva	Shaw, 1925	identical	INSofmTCSRAAPEI-57	PRJNA286405	SAMN04005190	SRR2230575	GDWT00000000	GDWT01000000	Present study
Blattodea	Corydioidea	Corydiinae	Ergaula	capucina	(Brunner von Wattenwyl, 1893)	identical	INShkeTAERAAPEI-89	PRJNA273034	SAMN03339337	SRR1811970	GDBS00000000	GDBS01000000	Wipfler et al., unpublished
Blattodea	Corydioidea	Corydiinae	Eucorydia	yasumatsui	Asahina, 1971	identical	INSjdsTAMRAAPEI-41	PRJNA286371	SAMN04005156	SRR2230541	GDZF00000000	GDZF01000000	Present study
Blattodea	Corydioidea	Corydiinae	Polyphaga	aegyptiaca	(Linnaeus, 1758)	identical	INSofmTAARAAPEI-33	PRJNA286439	SAMN04005225	SRR2230610	GDWJ00000000	GDWJ01000000	Present study
Blattodea	Corydioidea	Corydiinae	Therea	bernhardti	Fritzsche, 2009	identical	INShkeTCBRAAPEI-36	PRJNA286466	SAMN04005252	SRR2230637	GDVQ00000000	GDVQ01000000	Present study
Blattodea	Corydioidea	Tiviinae	Tivia	sp.	-	Name in NCBI: Tivia sp. AD-2015	INSofmTCFRAAPEI-26	PRJNA286468	SAMN04005254	SRR2230639	GDYD00000000	GDYD01000000	Present study
Blattodea	Corydioidea	Nocticolinae	Nocticola	sp.	-	Name in NCBI: Nocticola sp. AD-2015	INSqiqTBARAAPEI-26	PRJNA286415	SAMN04005200	SRR2230585	GDYB00000000	GDYB01000000	Present study
Blattodea	Cryptocercidae	Cryptocercinae	Cryptocercus	wrighti	Burnside, Smith & Kambhampati, 1999	identical	INSytvTCDRAAPEI-35	PRJNA219546	SAMN02047199	SRR921587	GAZN00000000	GAZN02000000	Misof et al. 2014 (current assembly)
Blattodea	Isoptera	Kalotermitidae	Incisitermes	marginipennis	(Latreille, 1811)	identical	INSeqtTBPRAAPEI-79	PRJNA273038	SAMN03339341	SRR1811974	GDBO00000000	GDBO01000000	Wipfler et al., unpublished
Blattodea	Isoptera	Mastotermitidae	Mastotermes	darwiniensis	Froggatt, 1897	identical	INStmbTBPRAAPEI-20	PRJNA219576	SAMN02047123	SRR921616	GAZE00000000	GAZE02000000	Misof et al. 2014 (current assembly)
Blattodea	Isoptera	Rhinotermitidae	Prorhinotermes	simplex	(Hagen, 1858)	identical	INSbusTBMRAAPEI-78	PRJNA219597	SAMN02047122	SRR921637	GASE00000000	GASE02000000	Misof et al. 2014 (current assembly)
Blattodea	Isoptera	Rhinotermitidae	Reticulitermes	santonensis	Feytaud, 1924	identical	INSeqtTBYRAAPEI-8	PRJNA286449	SAMN04005235	SRR2230620	GDVA00000000	GDVA01000000	Present study
Blattodea	Isoptera	Termitidae / Termitinae	Coptotermes	sp.	-	Name in NCBI: Coptotermes sp. AD-2015	INSerlTCDRAAPEI-22	PRJNA286352	SAMN04005137	SRR2230522	GDUG00000000	GDUG01000000	Present study
Blattodea	Isoptera	Termopsidae	Zootermopsis	nevadensis	(Hagen, 1874)	-	Version 2.2	http://termitegenome.org/?q=consortium_datasets; cleaned version kindly provided by R. Waterhouse	-	-	-	-	Terrapon et al. 2014
Blattodea	Lamproblattidae	Lamproblattinae	Lamproblatta	albipalpus	Hebard, 1919	identical	INStmbTAMRAAPEI-88	PRJNA273039	SAMN03339342	SRR1811975	GCPS00000000	GCPS01000000	Wipfler et al., unpublished
Blattodea	Tryonicidae	Tryonicinae	Tryonicus	parvus	(Tepper, 1895)	identical	INSofmTCZRAAPEI-83	PRJNA286471	SAMN04005257	SRR2230642	GDWV00000000	GDWV01000000	Present study
Dermaptera	Diplatyidae	-	Diplatys	sp.	-	Name in NCBI: Diplatys sp. AD-2014	INSodkTABRAAPEI-56	PRJNA273033	SAMN03339336	SRR1811969	GDCS00000000	GDCS01000000	Wipfler et al., unpublished
Dermaptera	Forficulidae	-	Forficula	auricularia	Linnaeus, 1758	identical	INSjdsTBNRAAPEI-89	PRJNA219558	SAMN02047143	SRR921598	GAYQ00000000	GAYQ02000000	Misof et al. 2014 (current assembly)
Embioptera	Clothodidae	-	Antipaluria	urichi	(Saussure, 1896)	identical	INSobdTBIRAAPEI-136	PRJNA273020	SAMN03339323	SRR1811956	GDCK00000000	GDCK01000000	Wipfler et al., unpublished
Embioptera	Oligotomidae	-	Haploembia	palaui	Stefani, 1955	identical	INSytvTAHRAAPEI-17	PRJNA219565	SAMN02047183	SRR921605	GAZA00000000	GAZA02000000	Misof et al. 2014 (current assembly)
Grylloblattodea	Grylloblattidae	-	Galloisiana	yuasai	Asahina, 1959	identical	INSfrgTAKRAAPEI-21	PRJNA219560	SAMN02047172	SRR921600	GAWN00000000	GAWN02000000	Misof et al. 2014 (current assembly)
Grylloblattodea	Grylloblattidae	-	Grylloblatta	bifratrilecta	Gurney, 1953	identical	INSnfrTBKRAAPEI-9	PRJNA219561	SAMN02047192	SRR921601	GAWP00000000	GAWP02000000	Misof et al. 2014 (current assembly)
Mantodea	Empusidae	-	Empusa	pennata	(Thunberg, 1815)	identical	INSfrgTASRAAPEI-36	PRJNA219551	SAMN02047168	SRR921590	GAWT00000000	GAWT02000000	Misof et al. 2014 (current assembly)
Mantodea	Mantoididae	-	Mantoida	sp.	-	Name in NCBI: Mantoida sp. AD-2015	INSerlTADRAAPEI-93	PRJNA286401	SAMN04005186	SRR2230571	GDUO00000000	GDUO01000000	Present study
Mantodea	Metallyticidae	-	Metallyticus	splendidus	Westwood, 1835	identical	INShauTAMRAAPEI-94	PRJNA219580	SAMN02047174	SRR921620	GATB00000000	GATB02000000	Misof et al. 2014 (current assembly)
Mantophasmatodea	Mantophasmatidae	-	Mantophasma	sp.	-	Name in NCBI: Mantophasma sp. AD-2014	INShkeTCFRAAPEI-84	PRJNA273040	SAMN03339343	SRR1811976	GDBV00000000	GDBV01000000	Wipfler et al., unpublished
Mantophasmatodea	Tanzaniophasmatidae	-	Tanzaniophasma	sp.	-	Name in NCBI: Tanzaniophasma sp. AD-2013	INSfrgTBBRAAPEI-56	PRJNA219604	SAMN02047176	SRR921644	GAXB00000000	GAXB02000000	Misof et al. 2014 (current assembly)
Orthoptera / Caelifera	Pyrgomorphidae	-	Aularches	miliaris	(Linnaeus, 1758)	identical	INSswpTAURABPEI-14	PRJNA273022	SAMN03339325	SRR1811958	GDCF00000000	GDCF01000000	Wipfler et al., unpublished
Orthoptera / Caelifera	Tridactylidae	-	Xya	variegata	(Latreille, 1809)	identical	INSjdsTAZRAAPEI-44	PRJNA273062	SAMN03339365	SRR1811998	GCPJ00000000	GCPJ01000000	Wipfler et al., unpublished
Orthoptera / Ensifera	Phalangopsidae	-	Phaeophilacris	bredoides	Kaltenbach, 1986	identical	INSeqtTDKRAAPEI-93	PRJNA273046	SAMN03339349	SRR1811982	GDBR00000000	GDBR01000000	Wipfler et al., unpublished
Orthoptera / Ensifera	Gryllacrididae	-	Nippancistroger	testaceus	(Matsumura & Shiraki, 1908)	identical	INSeqtTCQRAAPEI-35	PRJNA273043	SAMN03339346	SRR1811979	GCPE00000000	GCPE01000000	Wipfler et al., unpublished
Phasmatodea	Bacillidae	-	Antongilia	madagassa	(Brunner von Wattenwyl, 1907)	identical	INSofmTARRABPEI-83	PRJNA286380	SAMN04005165	SRR2230550	GDYR00000000	GDYR01000000	Present study
Phasmatodea	Heteropterygidae	-	Orestes	mouhotii	(Bates, 1865)	identical	RINSwvkTBIRAAPEI-118	PRJNA286420	SAMN04005205	SRR2230590	GDZN00000000	GDZN01000000	Present study
Phasmatodea	Timematidae	-	Timema	cristinae	Vickery, 1993	identical	INSnfrTBPRAAPEI-15	PRJNA219610	SAMN02047191	SRR921650	GAVX00000000	GAVX02000000	Misof et al. 2014 (current assembly)
Plecoptera	Eustheniidae	-	Cosmioperla	kuna	(Theischinger, 1983)	identical	INStmbTBFRAAPEI-31	PRJNA219544	SAMN02047101	SRR921585	GAYL00000000	GAYL02000000	Misof et al. 2014 (current assembly)
Plecoptera	Nemouridae	-	Protonemura	ausonia	(Consiglio, 1955)	identical	INSeqtTCZRAAPEI-47	PRJNA273052	SAMN03339355	SRR1811988	GDBP00000000	GDBP01000000	Wipfler et al., unpublished
Zoraptera	Zorotypidae	-	Zorotypus	caudelli	Karny, 1927	identical	INSjdsTAQRAAPEI-46	PRJNA219620	SAMN02047173	SRR921660	GAYA00000000	GAYA02000000	Misof et al. 2014 (current assembly)
